# Supplementary material
Source: PubMed Central journal article supplement (PMC3589129)

Figure S1 -Relates to Figure 1

A

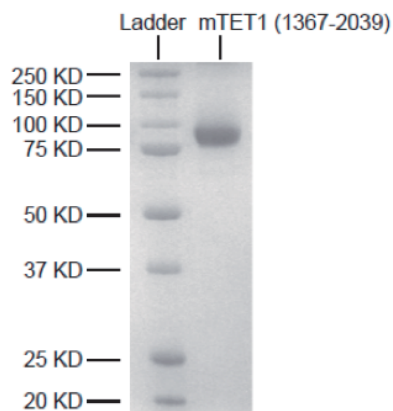

B

(-) mTET1: n=23, 0.79% of CpG cytosine conversion, 99.85% of non-CpG conversion

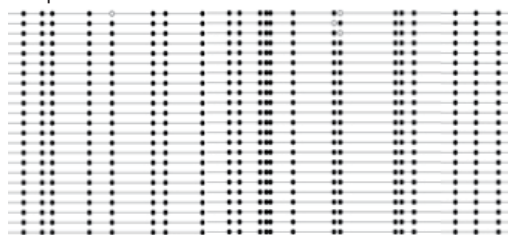

(+) mTET1: n=23, 99.19% of CpG cytosine conversion, 99.75% of non-CpG conversion

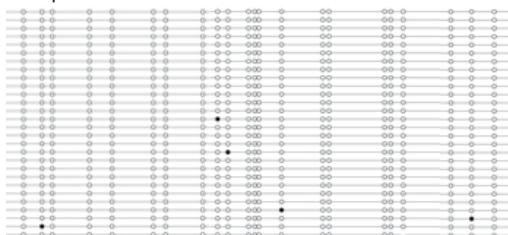

C

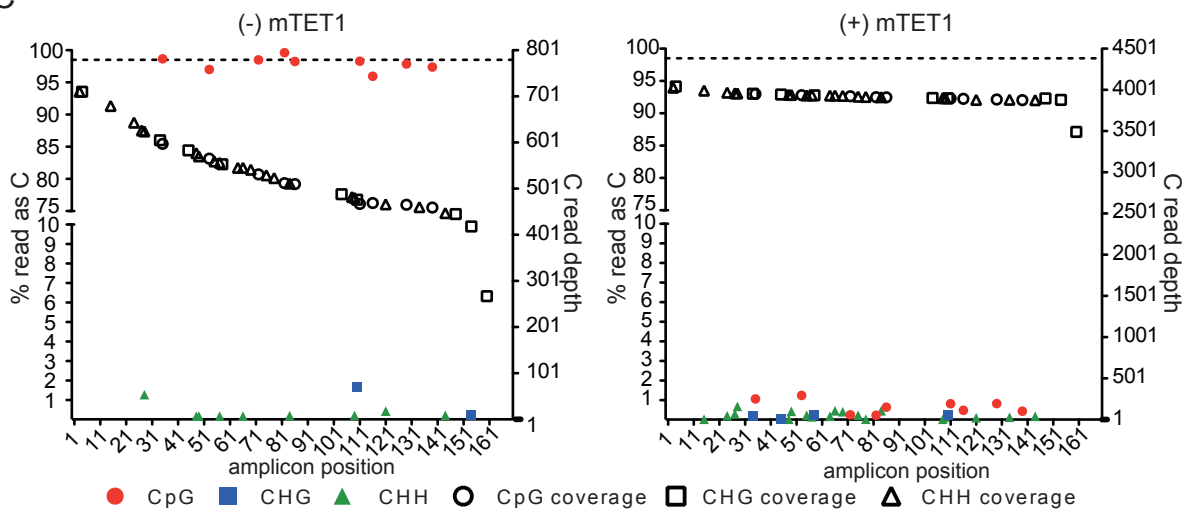

D

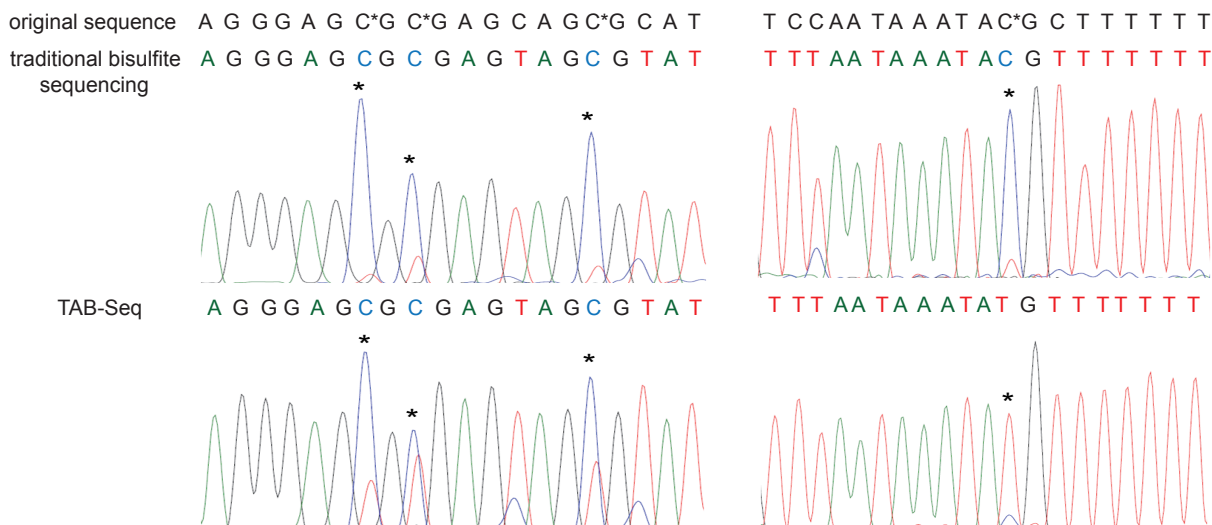

Figure S2 - Relates to Figure 2

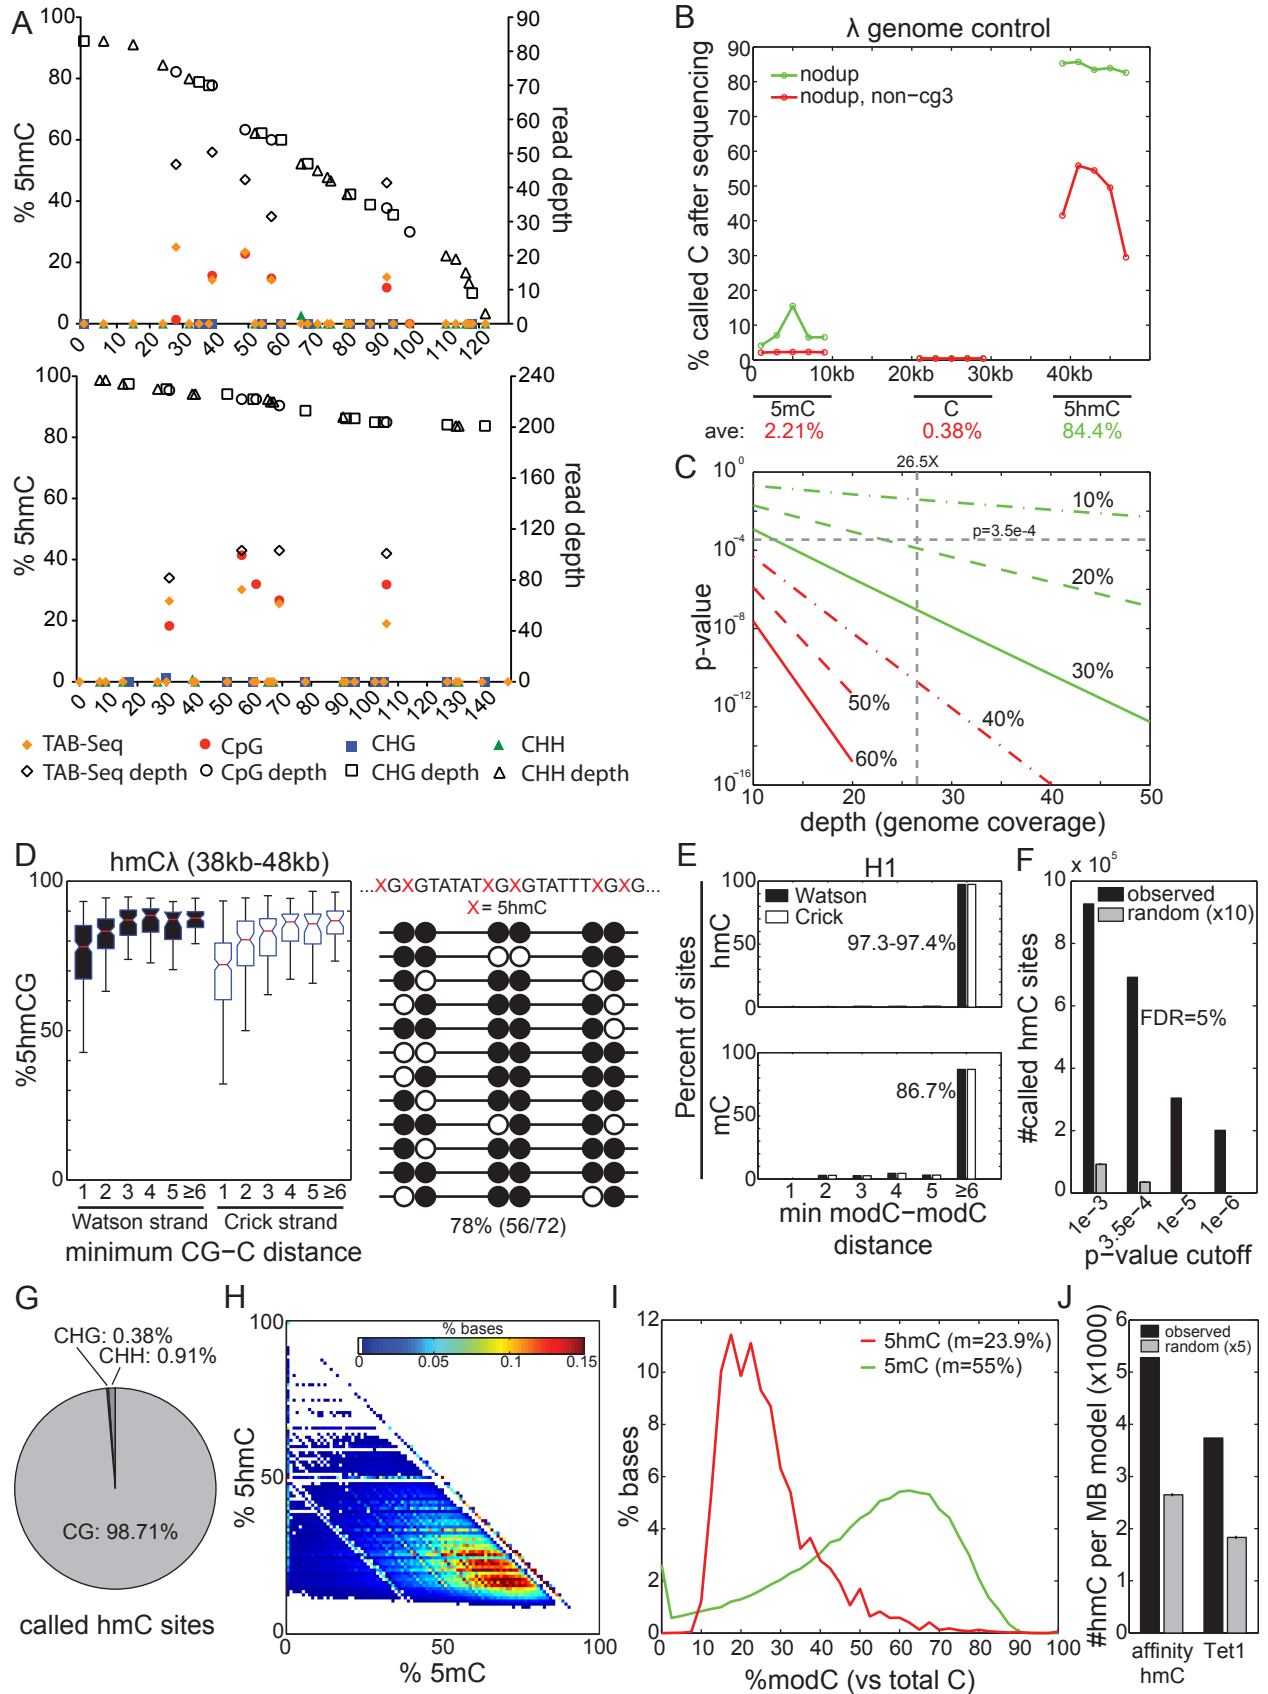

Figure S3 - Relates to Figure 3

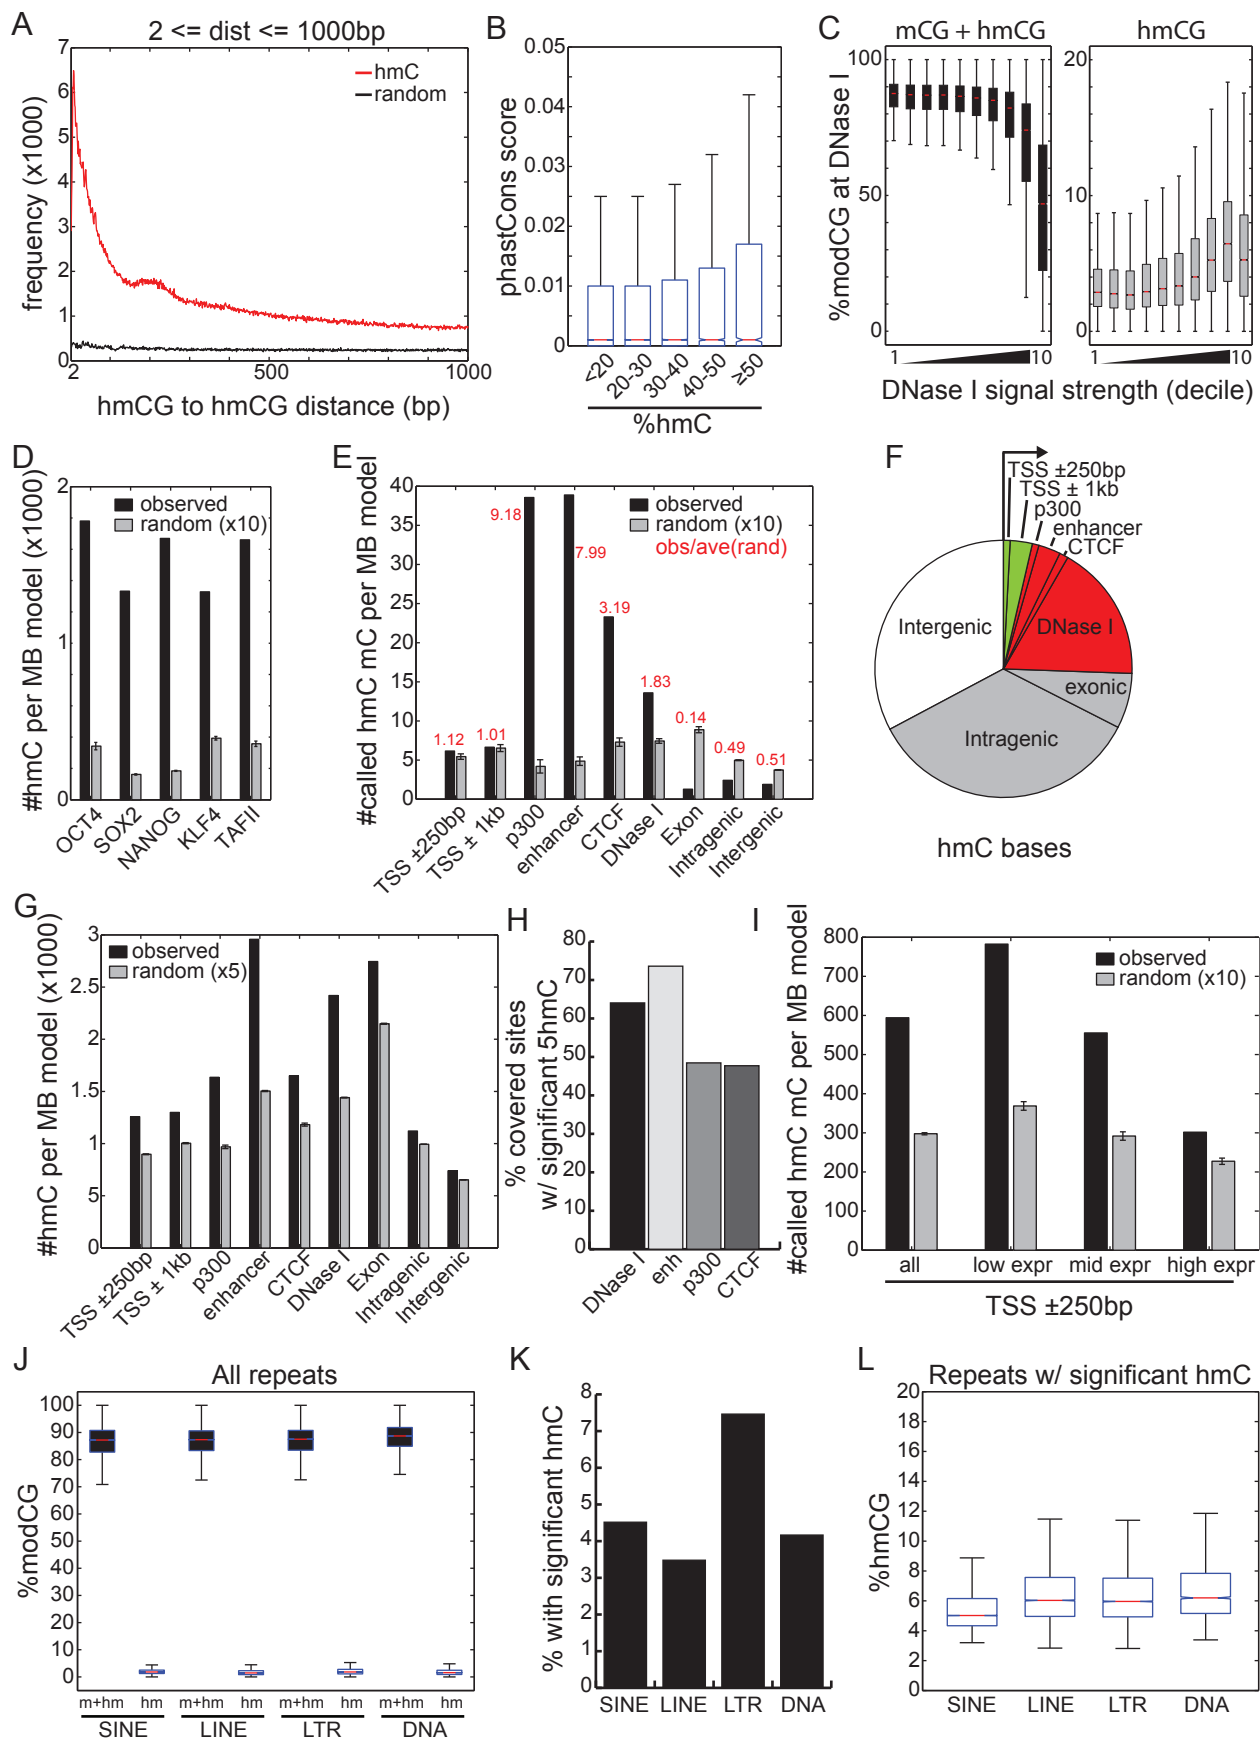

Figure S4 - Relates to Figure 4

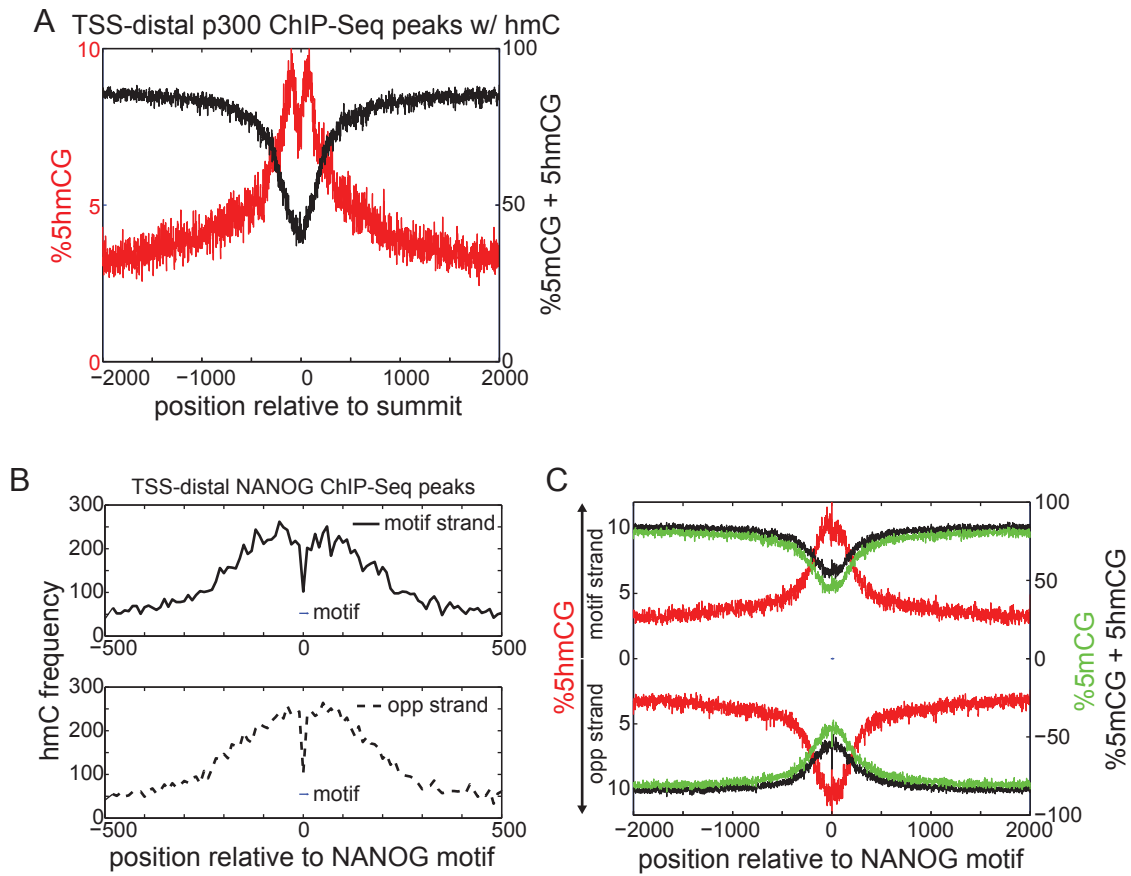

Figure S5 - Relates to Figure 5

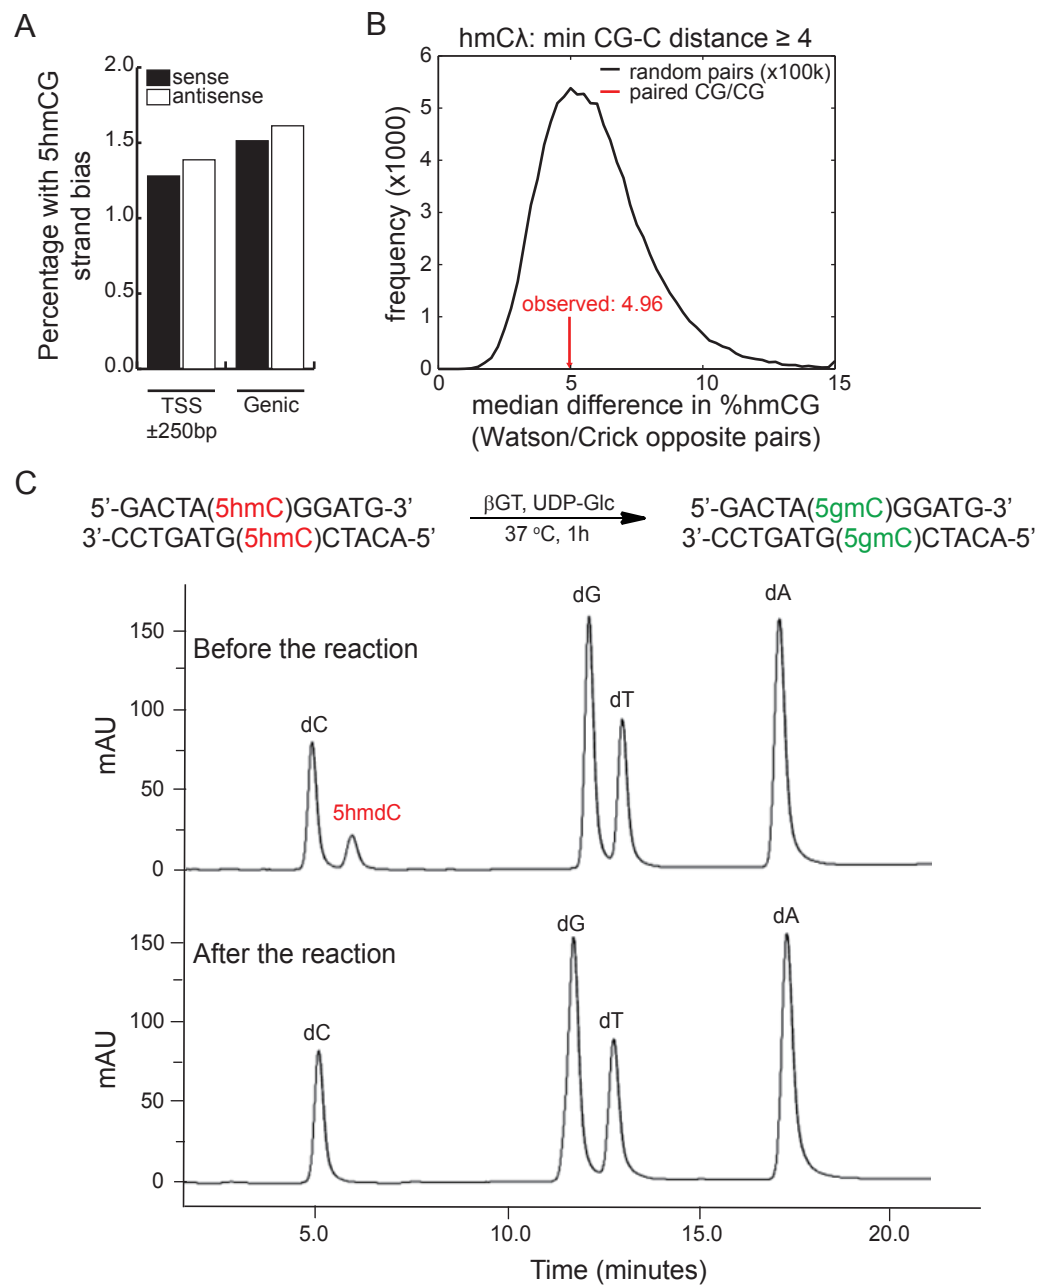

Figure S6 - Relates to Figure 6

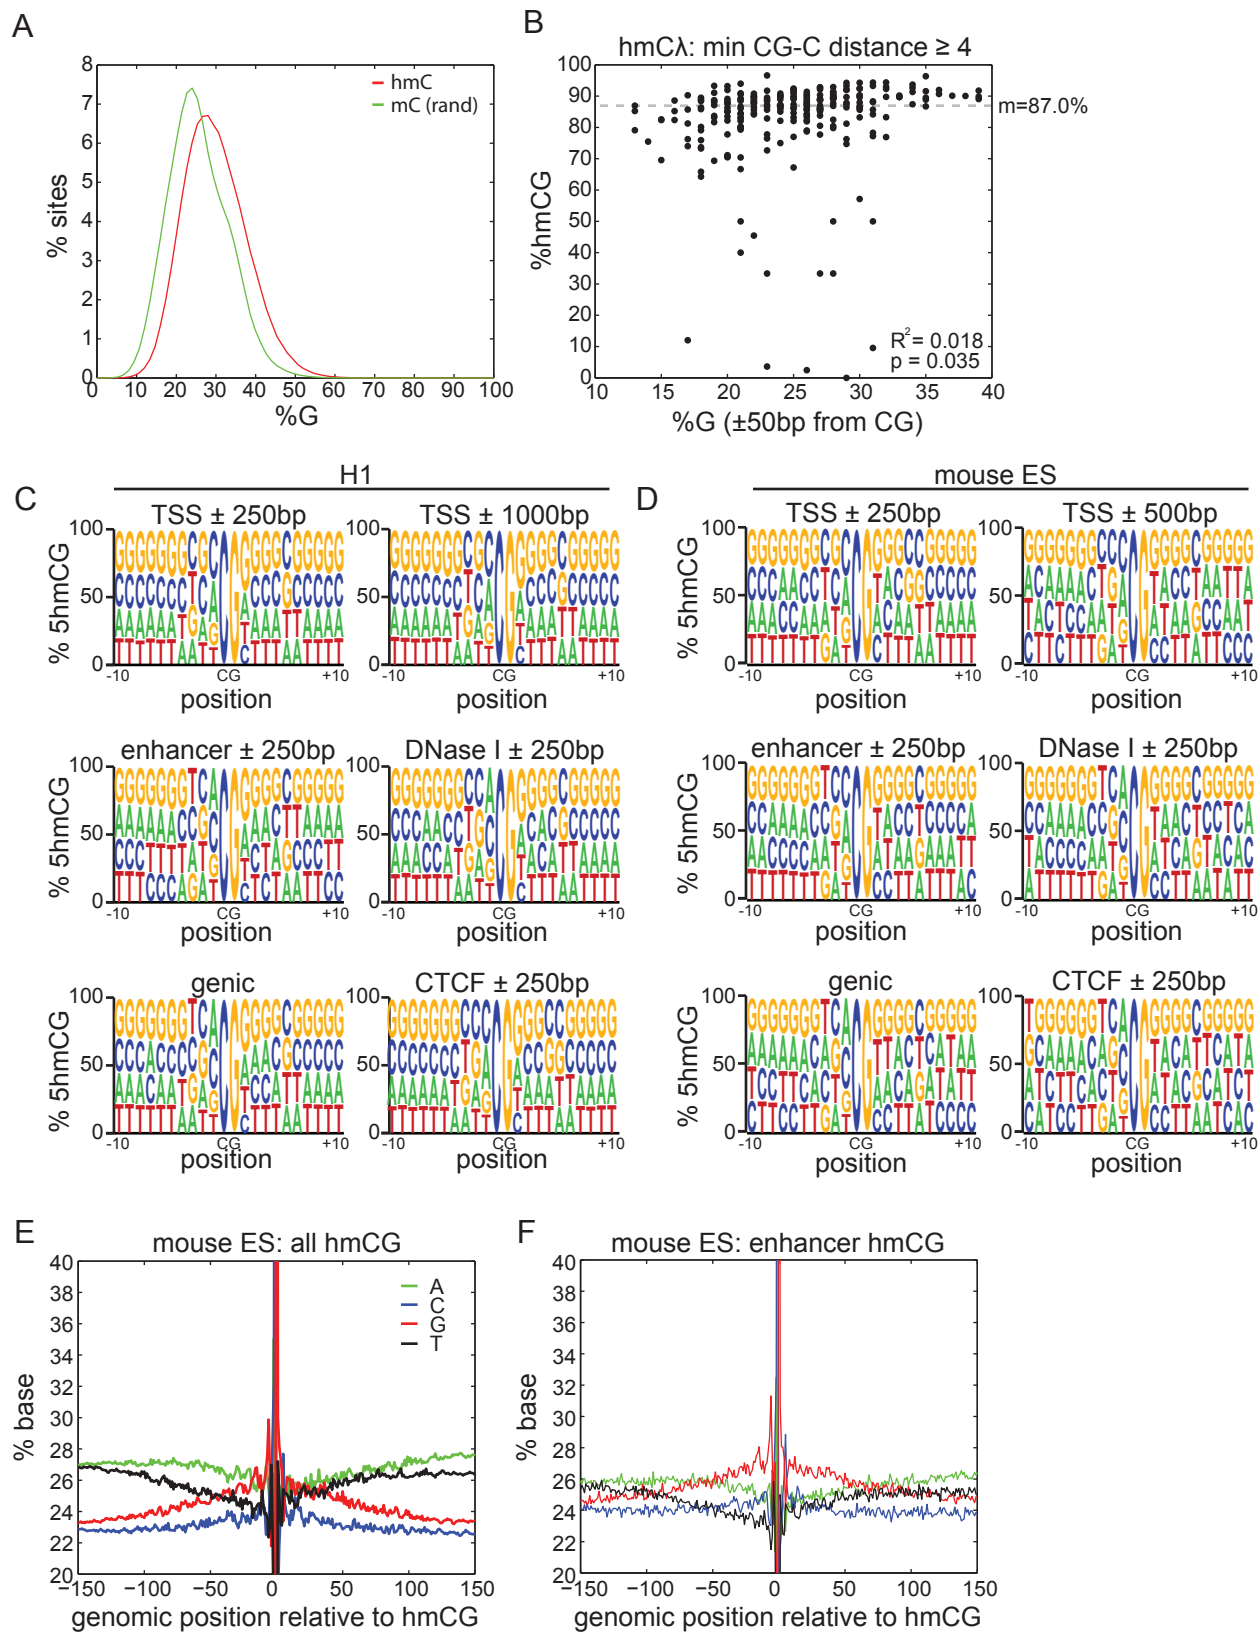

Figure S7 - Relates to Figure 7

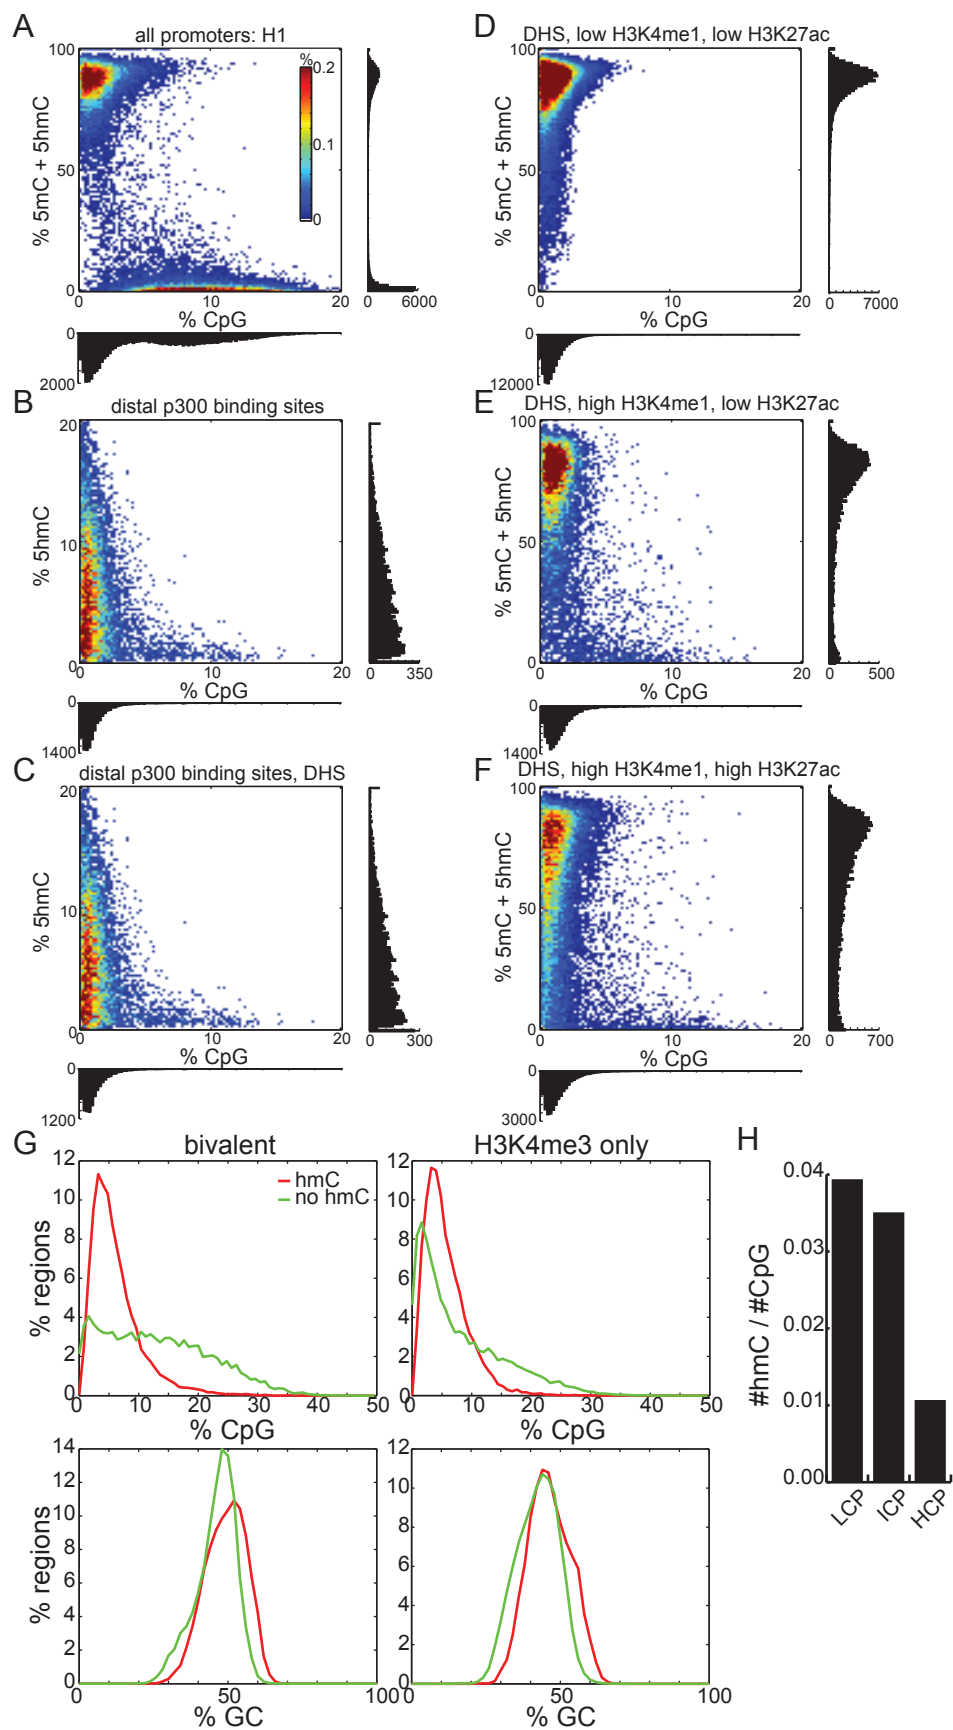

Supplement: NIHMS375032-supplement-02.pdf [file NIHMS375032-supplement-02.pdf]
